# Supplementary material
Source: PubMed Central journal article supplement (PMC2845278)
Supplement: emboj20106s1.pdf [file emboj20106s1.pdf]

## Supplementary Figure Legends

**Figure S1** Aligned sequences of VHS domain-containing proteins in the region corresponding to the C-terminal half of the domain. The secondary structure of the human STAM1 VHS domain is shown with solid bars to indicate  $\alpha$ -helices. Identically conserved residues that are not directly involved in binding are shaded gray.

**Figure S2** Additional SPR binding curves. (A) Full-length ESCRT-0. (B) STAM1 VHS domain. (C) STAM1 VHS-UIM. (D) Hrs DUIM. (E) Hrs FYVE-VHS-DUIM. (F) Vps27 tandem UIMs.

|           |    | $\alpha 5$          | $\alpha 6$                | $\alpha 7$          | $\alpha 8$               |     |
|-----------|----|---------------------|---------------------------|---------------------|--------------------------|-----|
| STAM1_Hs  | 79 | IFHLEVCSRDFASEVS    | .....NVLN.KGHPKVCEK       | LKALMVEWTDEFKNDPQLS | .....LISAMIKNLKEQGVTFP.  | 143 |
| STAM2_Hs  | 79 | IFHLEVCSRDFATEVR    | .....AVIKNKAHPKVCEK       | LKSLMVEWSEEFQKDPQFS | .....LISATIKSMKEEGITFP.  | 144 |
| Hse1_Sc   | 79 | RLRQEISSKNFTSLLY    | .....ALIESHSVHITLKKAVT    | DVVKQLSDSFKDDPSLR   | .....AMGDLYDKIKRKAPYLVQ  | 146 |
| Hrs_Hs    | 78 | TVHDEVANKQTMEEK     | .....DLLKRQVEVNVRNKILYLI  | QAWAHAFRNEPKYK      | .....VVQDTYQIMKVEGHVFP.  | 143 |
| Hrs_Dm    | 76 | PVHEEVFTKENCEMFS    | .....SFLESTPHENVRQKMLEL   | VQTWAYAFRSDKYQ      | .....AIKDTMTILKAKGHTFP.  | 141 |
| Vps27_Sc  | 83 | PFIKEICSREFMDTMEH   | .....VILREDSNEELSELVKTILY | EYVAFKNDSQLN        | .....YVAKVYDKLISRGIKFPE  | 150 |
| GGA1_Hs   | 80 | RFHDEVGKFRFLNELIKVV | SPKYLGSRTSEKVKNKILELLYS   | WTVGLPEEVK          | .....IAEAYQMLKKQGIVKSD   | 148 |
| GGA2_Hs   | 96 | KFHSEVAKFRFLNELIKVL | SPKYLGSWATGKVKGRVIEILFS   | WTVWFPEDIK          | .....IRDAYQMLKKQGIKQD    | 164 |
| GGA3_Hs   | 79 | RFHNEVGKFRFLNELIKVV | SPKYLGDRVSEKVKTKVIELLYS   | WTMALPEEAK          | .....IKDAYHMLKRQGIVQSD   | 147 |
| GGA1_Sc   | 93 | SIHLQISRKEFLNDLVKR  | ..FPEQPPLRYSKVQQMILEAIE   | EWYQTICKHAS         | YKDDLQYINDMHKLLKYKGYTFP. | 165 |
| GGA2_Sc   | 97 | PFHLQISRKEFLNELVKR  | ..FPGHPPLRYSKIQRILITAI    | EWYQTICKHSSYKNDMGY  | IRDMHRLLLKYKGYAFP.       | 169 |
| TOM1_Hs   | 84 | RFHVLVASQDFVESVLVR  | ..TILPKNNPPTIVHDKVLNLI    | QSWADAFRSPDLT       | .....GVVTIYEDLRRKGLEFP.  | 152 |
| TOM1L1_Hs | 86 | SFQSLIVKKEFVKENLVK  | ..LLNPRYNLPLDIQNRILNF     | IKTWSQGFPGVDVS      | .....EVKEVYLDLVKKGVPFP.  | 154 |

Figure S1

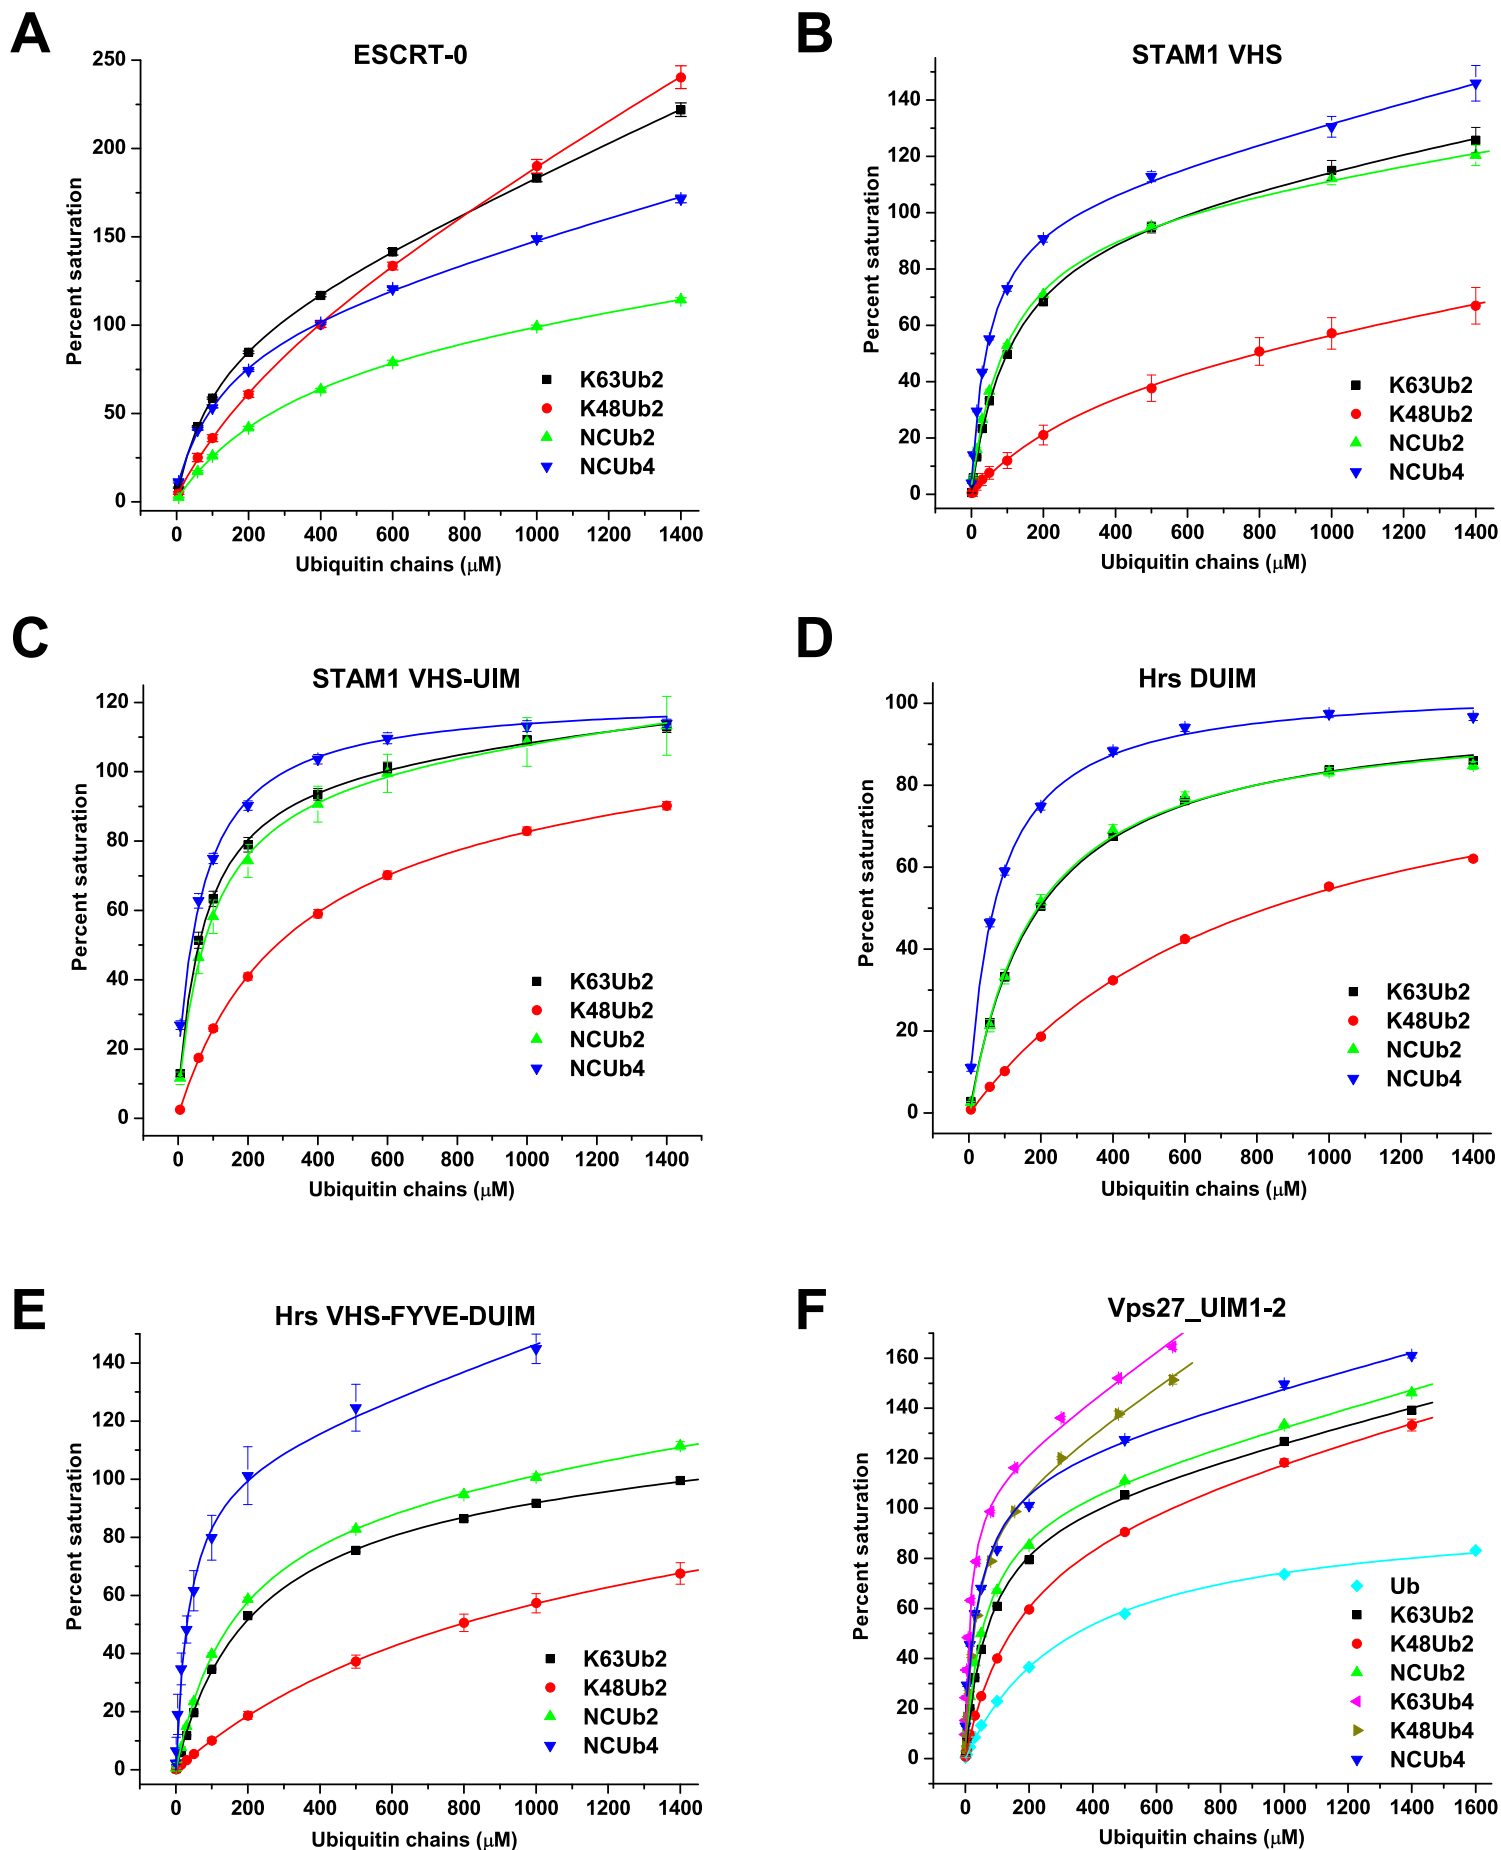

Figure S2

Table S1. List of bacterial expression constructs.

| Plasmid Name       | DNA insert codes for: |
|--------------------|-----------------------|
| pGST2-STAM1-VHS    | Human STAM1 (2-143)   |
| pGST2-STAM-VHS-UIM | Human STAM1 (2-200)   |
| pGST1-STAM-UIM     | Human STAM1 (158-200) |
| pGST1-Hrs-VHS      | Human Hrs(2-143)      |
| pGST1-Hrs-DUIM     | Human Hrs (250-289)   |
| pGST1-GGA1-VHS     | Human GGA1 (1-148)    |
| pGST1-GGA2-VHS     | Human GGA2 (1-164)    |
| pGST1-GGA3-VHS     | Human GGA3 (1-147)    |
| pGST1-TOM1-VHS     | Human TOM1 (1-152)    |
| pGST1-TOM1L1-VHS   | Human TOM1L1 (1-154)  |
| pGST2-Hse1-VHS     | Sc Hse1 (1-146)       |
| pGST1-Vps27-VHS    | Sc Vps27 (2-150)      |
| pGST1-Gga1-VHS     | Sc Gga1 (1-165)       |
| pGST1-Vps27-UIM1-2 | Sc Vps27 (245-330)    |

Table S2. List of plasmids for yeast experiments.

| plasmid                                        | Description                                                           |
|------------------------------------------------|-----------------------------------------------------------------------|
| <i>VPS27</i> /YCplac111                        | <i>VPS27</i> wild-type cassette/YCplac111                             |
| <i>HSE1</i> /YCplac22                          | <i>HSE1</i> wild-type cassette/YCplac22                               |
| <i>HSE1</i> <sup>ΔUIM</sup> /YCplac22          | <i>HSE1</i> cassette A170Q/S174D/YCplac22                             |
| <i>HSE1</i> <sup>ΔVHS</sup> /YCplac22          | <i>HSE1</i> cassette W25A/L29D/YCplac22                               |
| <i>HSE1</i> <sup>ΔVHSAUIM</sup> /YCplac22      | <i>HSE1</i> W25A/L29D/ A170Q/S174D/YCplac22                           |
| <i>VPS27</i> <sup>ΔUIM1-2</sup> /YCplac111     | <i>VPS27</i> cassette A266Q/S270D/A309Q/S313D/YCplac111               |
| <i>VPS27</i> <sup>ΔVHSAUIM1-2</sup> /YCplac111 | <i>VPS27</i> cassette L28A/L32D/<br>A266Q/S270D/A309Q/S313D/YCplac111 |
| pGO45                                          | GFP-tagged Carboxypeptidase S/pRS426 (Odorizzi et al. 1998)           |
